# Supplementary material for: Insights into the diversity of cow milk production systems on the fringes of coastal cities in West Africa: A case study from Benin
Source: Frontiers journal article supplement (doi:10.3389/fsufs.2022.1001497), 2022-09-13
Supplement: Table_1.DOCX [file Table_1.DOCX]

**Insights into the diversity of cow milk production systems on the fringes of coastal cities in West Africa: A case study from Benin**

**Fifame Panine Yassegoungbe1,3, David Oloukoi1, Augustin K.N. Aoudji2, Eva Schlecht3, Luc Hippolyte Dossa1**

1School of Sciences and Technics of Animal Production, Faculty of Agricultural Sciences, University of Abomey-Calavi, Abomey-Calavi, Benin

2School of Economics, Socio-Anthropology and Communication for Rural Development, Faculty of Agricultural Sciences, University of Abomey-Calavi, Abomey-Calavi, Benin

3Animal Husbandry in the Tropics and Subtropics, University of Kassel / Georg-August-Universität Göttingen, Göttingen, Germany

*** Correspondence:** Luc Hippolyte Dossa*****
E-mail address: hippolyte.dossa@fsa.uac.bj

**Appendix table:**

| Variable | Type | Description |
| --- | --- | --- |
| Ethnic group | Categorical | Ethnic group of the livestock keeper (Fulani/Fon/Goun/others) |
| Age | Numerical | Age of the livestock keeper (years) |
| Sex | Binary | Gender of the livestock keeper (male/female) |
| Education levels | Categorical | Education levels of the livestock keeper (illiterate/primary/secondary/university) |
| Main activity | Categorical | Main activity of the livestock keeper (cattle keeping/agriculture/trader/civil servant) |
| Main source of income | Categorical | Main source of income of the livestock keeper (cattle keeping/agriculture/trader/civil servant) |
| Experience in cattle farming | Numerical | Years of experience of the livestock keeper for keeping cattle (years) |
| Livestock keepers’ status | Categorical | Status of the livestock keepers in the farm (owner-keeper / employed keeper) |
| Herd size | Categorical | Herd size divided into 3 classes (≤ 30 heads /31-70 heads / ≥ 70 heads) |
| Total herd size | Numerical | Total number of cattle in the herd (n) |
| Cows’ number | Numerical | Number of cows in the herd (n) |
| Adult bulls in herd | Numerical | Proportion of bulls in the herd (%) |
| Cows in herd | Numerical | Proportion of cows in the herd (%) |
| Heifers in herd | Numerical | Proportion of heifers in the herd (%) |
| Young bulls in herd | Numerical | Proportion of young bulls in the herd (%) |
| Male calves in herd | Numerical | Proportion of male calves in the herd (%) |
| Female calves in herd | Numerical | Proportion of female calves in the herd (%) |
| Sex ratio | Continuous | Proportion of bulls to cows in the herd (number of bulls in the herd divided by cows number) |
| Cows’ breed | Categorical | Dominant breed in the herd (*Boboji* (taurine), *Yakana* (zebu) and *Yakana* x *Goudali* (zebu crossbreed)) |
| Feeding strategy | Categorical | Way of feeding cattle (natural pasture / feed supplementation / natural pasture and feed supplementation) |
| Daily grazing duration | Numerical | Duration of daily time on pasture (hours) |
| Grazing frequency per day | Categorical | Times per day that cattle are taken to pasture (once / twice) |
| Mineral supplementation | Binary | Practice of mineral supplementation of cattle (yes / no) |
| Watering infrastructure | Binary | Existence of infrastructure for watering cattle in the farm (yes / no) |
| Quantity of milk produced per herd per day (RS) | Numerical | Average quantity of milk produced per herd in the rainy season (liters/day) |
| Quantity of milk produced per herd per day (DS) | Numerical | Average quantity of milk produced per herd in the dry season (liters/day) |
| Milking duration | Numerical | Average period per lactation that cows are milked (months) |
| Milk transformation into cheese | Binary | Processing milk into local cheese “*Wagashi*” (yes / no) |
| Use of occasional workforce | Binary | Periodically employing additional (external) workforce (yes / no) |
| Enclosure to confine the herd at night | Binary | Practice of herd Enclosure by livestock keepers at night (yes / no) |
| Manure valorization | Categorical | Main use of manure (sale / use on own land / no valorization) |
| Integration of cattle and coconut trees | Binary | Use of cattle manure for coconut tree fertilization (yes / no) |
| Contribution of cattle sales in total income from cattle husbandry | Continuous | Share of income from cattle sales in total income from cattle husbandry (%) |
| Contribution of milk sales in total income from cattle husbandry | Continuous | Share of the income from milk sales in total income from cattle husbandry (%) |
