# Supplementary material for: Insights into the diversity of cow milk production systems on the fringes of coastal cities in West Africa: A case study from Benin
Source: Frontiers journal article supplement (doi:10.3389/fsufs.2022.1001497), 2022-09-13
Supplement: Table_2.XLSX [file Table_2.XLSX]

## Sheet: Data-Typologie - MAI
N°Eleveur	Commune	Arrondissement	Age	Sexe	Ethnie	Religion	Statut_eleveur	Nombre_propriétaire_troupeau	Activité_principale_propriétaire	Activité_principale_bouvier	Activité_secondaire_bouvier	Principale_source_revenu	Principales_cultures	Mode_d’acquisition_terre	Possession_titre_foncier	Possession_animaux	Nombre_d’année_prise_en_charge_troupeau	Année_d’expérience	Appartenance_association_d’éleveur	Nom_d’association	Activités_menéesparlassociation	Effectiftotalduménage	Effectifdhommesdansleménage	Effectifdefemmesdansleménage	Effectifdenfantsgarconsdemoinsde15ansdansleménage	Effectifdenfantsgarconsdeplusde15ansdansleménage	Effectifdenfantsfillesdemoinsde15ansdansleménage	Effectifdenfantsfillesdeplusde15ansdansleménage	Niveaud’instruction	Alphabétisation	Elevaged’autresespècesoutrelesbovins	Effectifdevolailles	Effectifdovins	Effectifdecaprins	EffectifdeAutreespècePorc.…………………	Racesdebovinsélevées	Nombrederace	Effectiftotaldetroupeau	Effectiftotaldevaches	Effectiftotaldetaureau	Effectiftotaldegénisse	Effectiftotaldetaurillon	Effectiftotaldebouvillon	Effectiftotaldeveau	Effectiftotaldevelle	Effectiftotaldanimauxrecuenconfiage	Effectifdevacherecuenconfiage	Effectifdetaureaurecuenconfiage	Effectifdegénisserecuenconfiage
1	Abomey-Calavi	Calavi	44	Homme	Peulh	Musulman	Bouvier	1	Fonctionnaire en activité	Elevage	Agriculture	Elevage	Maïs	Achat	Oui	Non	18	23	Non	Néant	Néant	5	1	1	3	0	0	0	Aucun	Non	Oui	10	0	0	0	Yakana	1 race	92	80	3	0	0	4	5	0	0	0	0	0
2	Abomey-Calavi	Calavi	15	Homme	Peulh	Musulman	Bouvier	1	Ne sait pas	Elevage	Pas d'activité secondaire	Elevage	Aucune	Achat	Oui	Non	2	2	Non	Néant	Néant	1	1	0	0	0	0	0	Aucun	Non	Oui	35	17	15	0	Yakana	1 race	15	3	1	2	6	0	1	2	0	0	0	0
3	Abomey-Calavi	Calavi	32	Homme	Peulh	Musulman	Bouvier	1	Fonctionnaire en activité	Elevage	Agriculture	Elevage	Maïs	Achat	Oui	Non	2	15	Non	Néant	Néant	2	1	1	0	0	0	0	Aucun	Non	Oui	10	0	0	0	Yakana	1 race	24	20	1	0	3	0	0	0	0	0	0	0
5	Abomey-Calavi	Akassato	27	Homme	Peulh	Musulman	Bouvier	1	Ne sait pas	Elevage	Pas d'activité secondaire	Elevage	Aucune	Achat	Oui	Non	2	10	Non	Néant	Néant	1	1	0	0	0	0	0	Aucun	Non	Non	0	0	0	0	Yakana	1 race	43	23	2	5	3	0	7	3	0	0	0	0
7	Abomey-Calavi	Akassato	16	Homme	Peulh	Musulman	Bouvier	1	Commerçant	Elevage	Pas d'activité secondaire	Elevage	Aucune	Achat	Oui	Non	2	2	Non	Néant	Néant	1	1	0	0	0	0	0	Aucun	Non	Oui	10	5	0	0	Goudali et autres races	2 races	19	10	1	2	3	0	0	3	0	0	0	0
8	Abomey-Calavi	Zinvié	50	Homme	Peulh	Musulman	Bouvier	1	Ne sait pas	Elevage	Pas d'activité secondaire	Elevage	Aucune	Achat	Oui	Non	7	30	Non	Néant	Néant	5	1	1	2	0	1	0	Aucun	Non	Oui	5	6	3	0	Yakana	1 race	60	27	2	18	11	0	0	2	0	0	0	0
9	Abomey-Calavi	Zinvié	35	Homme	Peulh	Musulman	Bouvier	1	Fonctionnaire en activité	Elevage	Commercant	Elevage	Aucune	Location	Non	Non	5	20	Non	Néant	Néant	4	1	1	1	0	1	0	Aucun	Non	Oui	0	5	4	0	Goudali et autres races	2 races	52	8	2	23	10	0	2	7	0	0	0	0
10	Abomey-Calavi	Zinvié	50	Homme	Peulh	Musulman	Bouvier	1	Ne sait pas	Elevage	Agriculture	Elevage	Maïs	Achat	Oui	Non	5	30	Non	Néant	Néant	6	1	1	2	0	2	0	Aucun	Non	Oui	14	6	0	0	Bobodji	1 race	28	14	2	2	0	0	5	5	0	0	0	0
11	Abomey-Calavi	Togba	52	Homme	Peulh	Musulman	Bouvier	1	Ne sait pas	Elevage	Agriculture	Elevage	Maïs	Location	Non	Oui	1	30	Non	Néant	Néant	10	1	1	4	2	1	1	Aucun	Non	Non	0	0	0	0	Bobodji et Yakana	2 races	52	19	1	16	5	0	8	3	0	0	0	0
12	Abomey-Calavi	Kpanroun	35	Homme	Peulh	Musulman	Propriétaire	1	Elevage	Elevage	Pas d'activité secondaire	Elevage	Aucune	Achat	Ne sait pas	Oui	17	17	Non	Néant	Néant	3	1	1	1	0	0	0	Aucun	Non	Non	0	0	0	0	Yakana	1 race	33	24	1	0	0	0	4	4	0	0	0	0
13	Abomey-Calavi	Zinvié	35	Homme	Peulh	Musulman	Bouvier	1	Fonctionnaire en activité	Elevage	Agriculture	Elevage	Maïs	Achat	Oui	Non	17	20	Non	Néant	Néant	4	1	1	2	0	0	0	Aucun	Non	Oui	10	15	0	0	Yakana	1 race	96	50	2	13	7	0	7	17	0	0	0	0
14	Abomey-Calavi	Kpanroun	30	Homme	Peulh	Musulman	Bouvier	1	Ne sait pas	Elevage	Pas d'activité secondaire	Elevage	Aucune	Achat	Oui	Non	5	10	Non	Néant	Néant	3	1	1	1	0	0	0	Aucun	Non	Non	0	0	0	0	Yakana	1 race	13	4	1	2	0	0	3	3	0	0	0	0
15	Abomey-Calavi	Kpanroun	35	Homme	Peulh	Musulman	Bouvier	1	Religieux	Elevage	Pas d'activité secondaire	Elevage	Manioc et ananas	Achat	Oui	Non	5	15	Non	Néant	Néant	1	1	0	0	0	0	0	Aucun	Non	Non	0	0	0	0	Yakana	1 race	15	6	1	4	4	0	0	0	0	0	0	0
17	Abomey-Calavi	Kpanroun	65	Homme	Peulh	Musulman	Bouvier	1	Artisanat	Elevage	Agriculture	Elevage	Maïs	Achat	Oui	Non	6	40	Non	Néant	Néant	4	1	1	1	1	0	0	Aucun	Non	Non	0	0	0	0	Bobodji et Yakana	2 races	31	21	1	0	0	0	6	3	0	0	0	0
18	Abomey-Calavi	Calavi	70	Homme	Peulh	Musulman	Bouvier	1	Commerçant	Elevage	Pas d'activité secondaire	Elevage	Aucune	Achat	Oui	Non	2	50	Non	Néant	Néant	4	2	0	0	2	0	0	Aucun	Non	Non	0	0	0	0	Goudali et autres races	1 race	15	8	2	0	0	0	2	3	0	0	0	0
20	Abomey-Calavi	Togba	35	Homme	Peulh	Musulman	Bouvier	1	Fonctionnaire en activité	Elevage	Pas d'activité secondaire	Elevage	Aucune	Achat	Oui	Non	7	10	Non	Néant	Néant	6	1	1	1	0	3	0	Aucun	Non	Oui	15	0	0	0	Yakana	1 race	30	10	4	5	4	0	3	4	0	0	0	0
21	Abomey-Calavi	Togba	50	Homme	Peulh	Musulman	Bouvier	1	Fonctionnaire en activité	Elevage	Agriculture	Agriculture	Maïs	Achat	Oui	Oui	5	30	Non	Néant	Néant	7	1	1	3	0	2	0	Aucun	Non	Oui	0	7	0	0	Goudali et autres races	3 races	30	16	3	7	1	0	1	2	0	0	0	0
23	Abomey-Calavi	Akassato	29	Homme	Peulh	Musulman	Bouvier	1	Ne sait pas	Elevage	Pas d'activité secondaire	Elevage	Aucune	Achat	Oui	Non	1	12	Non	Néant	Néant	3	1	1	0	0	1	0	Aucun	Non	Oui	21	0	0	20	Goudali et autres races	3 races	37	13	3	5	6	0	5	5	0	0	0	0
25	Abomey-Calavi	Ouedo	35	Homme	Peulh	Musulman	Bouvier	1	Entrepreneur	Elevage	Agriculture	Elevage	Maïs	Achat	Non	Non	10	10	Non	Néant	Néant	7	1	1	2	0	3	0	Aucun	Non	Oui	12	5	0	0	Goudali et autres races	2 races	33	22	2	0	0	0	4	5	0	0	0	0
26	Abomey-Calavi	Hèvié	50	Homme	Peulh	Musulman	Bouvier	2	Ne sait pas	Elevage	Agriculture	Elevage	Maïs	Achat	Oui	Non	9	30	Non	Néant	Néant	9	1	1	4	1	2	0	Aucun	Non	Oui	55	0	0	0	Yakana	1 race	39	20	7	5	5	2	0	0	0	0	0	0
27	Abomey-Calavi	Hèvié	60	Homme	Peulh	Musulman	Propriétaire	1	Elevage	Elevage	Agriculture	Elevage	Maïs	Achat	Non	Oui	28	33	Non	Néant	Néant	4	1	1	0	1	0	1	Aucun	Non	Oui	40	10	0	0	Goudali et autres races	3 races	23	10	3	0	5	0	3	2	0	0	0	0
28	Abomey-Calavi	Hèvié	40	Homme	Peulh	Musulman	Bouvier	1	Commerçant	Elevage	Agriculture	Elevage	Maïs	Achat	Non	Non	10	20	Non	Néant	Néant	5	1	1	1	0	2	0	Aucun	Non	Non	0	0	0	0	Bobodji et Yakana	2 races	150	32	6	54	28	10	8	12	0	0	0	0
29	Abomey-Calavi	Togba	20	Homme	Peulh	Musulman	Bouvier	1	Elevage	Elevage	Agriculture	Elevage	Maïs, haricot et patate douce	Achat	Non	Non	0.5	0.5	Non	Néant	Néant	2	2	0	0	0	0	0	Primaire	Non	Oui	6	0	0	0	Goudali et autres races	2 races	19	5	4	2	8	0	0	0	0	0	0	0
32	Abomey-Calavi	Kpanroun	50	Homme	Peulh	Musulman	Bouvier	1	Ne sait pas	Elevage	Pas d'activité secondaire	Elevage	Aucune	Achat	Ne sait pas	Non	1	30	Non	Néant	Néant	1	1	0	0	0	0	0	Primaire	Oui	Non	0	0	0	0	Bobodji et Yakana	2 races	21	10	1	0	0	3	3	4	0	0	0	0
35	Abomey-Calavi	Calavi	36	Homme	Peulh	Musulman	Bouvier	1	Fonctionnaire en activité	Elevage	Agriculture	Elevage	Maïs et manioc	Achat	Ne sait pas	Non	10	18	Non	Néant	Néant	5	1	1	2	0	1	0	Aucun	Non	Oui	0	12	2	0	Goudali et autres races	2 races	43	17	4	6	2	0	4	10	0	0	0	0
36	Abomey-Calavi	Ouedo	32	Homme	Peulh	Musulman	Bouvier	1	Commerçant	Elevage	Commercant	Elevage	Maïs	Achat	Oui	Non	2	4	Non	Néant	Néant	2	1	1	0	0	0	0	Aucun	Oui	Non	0	0	0	0	Bobodji et Yakana	2 races	54	25	4	4	0	1	8	12	0	0	0	0
37	Abomey-Calavi	Togba	51	Homme	Peulh	Musulman	Bouvier	1	Elevage	Elevage	Commercant	Commerçant	Maïs	Achat	Oui	Oui	5	30	Oui	Ne sait pas	Formation et rencontre pour discuter des conflits et défendre l'interet des éleveurs	2	1	1	0	0	0	0	Aucun	Non	Oui	20	8	7	0	Yakana	1 race	53	24	3	10	4	1	11	0	0	0	0	0
38	Abomey-Calavi	Kpanroun	35	Homme	Peulh	Musulman	Bouvier	1	Elevage	Elevage	Agriculture	Elevage	Maïs	Achat	Oui	Oui	4	16	Non	Néant	Néant	5	1	1	0	1	2	0	Aucun	Non	Oui	25	10	0	0	Bobodji et Yakana	2 races	32	24	1	3	1	0	2	1	0	0	0	0
39	Abomey-Calavi	Togba	51	Homme	Peulh	Musulman	Bouvier	1	Ne sait pas	Elevage	Commercant	Commerçant	Maïs	Achat	Oui	Non	19	31	Oui	Ne sait pas	Ne sait pas	8	1	0	1	2	2	2	Aucun	Non	Oui	38	8	7	0	Bobodji	1 race	22	9	0	0	1	6	3	3	0	0	0	0
40	Abomey-Calavi	Ouedo	36	Homme	Peulh	Musulman	Bouvier	1	Commerçant	Elevage	Pas d'activité secondaire	Elevage	Aucune	Achat	Ne sait pas	Non	1	22	Non	Néant	Néant	3	1	1	0	0	1	0	Aucun	Non	Non	0	0	0	0	Yakana	1 race	28	5	5	8	4	0	3	3	0	0	0	0
41	Abomey-Calavi	Ouedo	31	Homme	Peulh	Musulman	Bouvier	1	Ne sait pas	Elevage	Agriculture	Elevage	Maïs et haricot	Achat	Oui	Non	2	23	Non	Néant	Néant	6	1	1	2	0	2	0	Aucun	Non	Non	0	0	0	0	Yakana	1 race	10	3	1	0	2	0	1	3	0	0	0	0
43	Abomey-Calavi	Akassato	24	Homme	Peulh	Musulman	Bouvier	1	Ne sait pas	Elevage	Pas d'activité secondaire	Elevage	Aucune	Achat	Oui	Non	7	8	Non	Néant	Néant	1	1	0	0	0	0	0	Aucun	Non	Non	0	0	0	0	Bobodji	1 race	32	19	1	4	3	0	4	1	0	0	0	0
44	Abomey-Calavi	Ouedo	43	Homme	Peulh	Musulman	Bouvier	1	Commerçant	Elevage	Pas d'activité secondaire	Elevage	Aucune	Achat	Oui	Non	5	25	Non	Néant	Néant	9	1	1	3	0	4	0	Aucun	Non	Non	0	0	0	0	Bobodji	1 race	68	40	1	10	5	0	6	6	0	0	0	0
45	Abomey-Calavi	Calavi	40	Homme	Peulh	Musulman	Bouvier	1	Ne sait pas	Elevage	Pas d'activité secondaire	Elevage	Aucune	Achat	Oui	Non	5	20	Non	Néant	Néant	4	1	1	1	0	1	0	Aucun	Non	Non	0	0	0	0	Yakana	1 race	25	10	4	3	0	2	6	0	0	0	0	0
47	Abomey-Calavi	Kpanroun	25	Homme	Peulh	Musulman	Bouvier	1	Ne sait pas	Elevage	Agriculture	Elevage	Maïs	Achat	Oui	Non	0.5	0.5	Non	Néant	Néant	5	1	1	2	0	1	0	Aucun	Non	Oui	18	0	0	0	Bobodji	1 race	21	8	1	4	0	0	5	3	0	0	0	0
48	Abomey-Calavi	Calavi	39	Homme	Peulh	Musulman	Bouvier	1	Fonctionnaire à la retraite	Elevage	Agriculture	Elevage	Maïs	Achat	Oui	Non	13	20	Non	Néant	Néant	5	1	1	2	0	1	0	Secondaire	Oui	Oui	20	5	2	0	Goudali et autres races	3 races	27	13	2	3	4	0	5	0	0	0	0	0
49	Abomey-Calavi	Calavi	32	Homme	Peulh	Musulman	Bouvier	1	Commerçant	Elevage	Pas d'activité secondaire	Elevage	Aucune	Achat	Ne sait pas	Oui	3	15	Non	Néant	Néant	4	1	1	2	0	0	0	Aucun	Non	Non	0	0	0	0	Yakana	1 race	35	15	3	5	5	0	3	4	0	0	0	0
50	Abomey-Calavi	Togba	22	Homme	Peulh	Musulman	Bouvier	1	Fonctionnaire à la retraite	Elevage	Agriculture	Elevage	Maïs	Achat	Oui	Non	3	3	Non	Néant	Néant	3	1	1	1	0	0	0	Aucun	Non	Oui	25	15	0	0	Bobodji et Yakana	2 races	20	10	1	5	2	0	1	1	0	0	0	0
51	Abomey-Calavi	Togba	46	Homme	Peulh	Musulman	Bouvier	1	Fonctionnaire en activité	Elevage	Agriculture	Elevage	Maïs	Achat	Oui	Non	4	23	Non	Néant	Néant	6	1	1	3	0	1	0	Aucun	Non	Oui	18	13	0	0	Goudali et autres races	2 races	29	7	2	12	4	0	3	1	0	0	0	0
53	Abomey-Calavi	Calavi	33	Homme	Peulh	Musulman	Bouvier	1	Ne sait pas	Elevage	Pas d'activité secondaire	Elevage	Aucune	Achat	Oui	Non	2	15	Non	Néant	Néant	6	2	3	0	0	1	0	Aucun	Non	Non	0	0	0	0	Yakana	1 race	81	45	4	12	10	0	6	4	0	0	0	0
54	Abomey-Calavi	Zinvié	30	Homme	Peulh	Musulman	Bouvier	1	Ne sait pas	Elevage	Pas d'activité secondaire	Elevage	Aucune	Achat	Ne sait pas	Non	5	15	Non	Néant	Néant	4	4	0	0	0	0	0	Aucun	Non	Non	0	0	0	0	Yakana	1 race	22	2	1	15	0	2	2	0	0	0	0	0
55	Abomey-Calavi	Zinvié	25	Homme	Peulh	Musulman	Bouvier	1	Ne sait pas	Elevage	Pas d'activité secondaire	Elevage	Aucune	Achat	Ne sait pas	Non	3	10	Non	Néant	Néant	4	4	0	0	0	0	0	Aucun	Non	Non	0	0	0	0	Yakana	1 race	55	17	1	14	0	3	11	9	0	0	0	0
56	Abomey-Calavi	Zinvié	32	Homme	Peulh	Musulman	Bouvier	1	Ne sait pas	Elevage	Pas d'activité secondaire	Elevage	Aucune	Achat	Ne sait pas	Non	5	16	Non	Néant	Néant	4	4	0	0	0	0	0	Aucun	Non	Non	0	0	0	0	Bobodji	1 race	14	6	1	0	0	1	3	3	0	0	0	0
1	Ouidah	Pahou	51	Homme	Peulh	Musulman	Bouvier	1	Fonctionnaire à la retraite	Elevage	Pas d'activité secondaire	Elevage	Aucune	Achat	Oui	Oui	8	17	Oui	ANOPER	Ne sait pas	12	3	1	2	0	5	1	Aucun	Non	Oui	30	10	0	0	Bobodji et Yakana	2 races	57	36	1	6	3	0	6	5	0	0	0	0
2	Ouidah	Pahou	48	Homme	Peulh	Musulman	Bouvier	3	Agriculture	Elevage	Pas d'activité secondaire	Elevage	Aucune	Achat	Non	Non	6	16	Oui	ANOPER	Ne sait pas	1	1	0	0	0	0	0	Primaire	Non	Oui	24	0	0	0	Bobodji et Yakana	2 races	51	21	3	11	1	1	9	5	0	0	0	0
3	Ouidah	Houakpè-Daho	48	Homme	Peulh	Musulman	Bouvier	1	Fonctionnaire en activité	Elevage	Pas d'activité secondaire	Elevage	Aucune	Achat	Non	Non	28	28	Oui	Ne sait pas	Ne sait pas	7	1	1	3	0	1	1	Primaire	Non	Oui	10	9	23	0	Bobodji et Yakana	2 races	44	24	5	3	0	0	6	6	0	0	0	0
4	Ouidah	Pahou	37	Homme	Peulh	Musulman	Bouvier	1	Ne sait pas	Elevage	Pas d'activité secondaire	Elevage	Aucune	Héritage	Oui	Non	9	18	Oui	Ne sait pas	Formation et rencontre pour discuter des conflits et défendre l'interet des éleveurs	6	1	1	2	0	2	0	Aucun	Non	Oui	15	0	0	0	Bobodji	1 race	110	64	3	14	6	2	9	12	0	0	0	0
5	Ouidah	Pahou	31	Homme	Peulh	Musulman	Bouvier	1	Ne sait pas	Elevage	Pas d'activité secondaire	Elevage	Aucune	Héritage	Oui	Non	2	13	Oui	Ne sait pas	Formation et rencontre pour discuter des conflits et défendre l'interet des éleveurs	5	1	1	1	0	2	0	Aucun	Non	Non	0	0	0	0	Bobodji	1 race	53	24	2	5	4	3	8	7	0	0	0	0
6	Ouidah	Avlékété	53	Homme	Peulh	Musulman	Bouvier	10	Pêche	Elevage	Pas d'activité secondaire	Elevage	Aucune	Location	Non	Oui	10	10	Oui	Ne sait pas	Formation, rencontre pour discuter des conflits et commerce, tontine ou aide financière	4	1	1	0	0	2	0	Aucun	Non	Oui	15	20	4	0	Bobodji	1 race	56	25	1	12	0	1	9	8	0	0	0	0
7	Ouidah	Avlékété	60	Homme	Peulh	Musulman	Bouvier	3	Agriculture	Elevage	Agriculture	Elevage	Maraichère et maïs	Achat	Oui	Non	5	13	Non	Néant	Néant	5	1	1	2	0	1	0	Aucun	Non	Oui	0	5	0	0	Goudali et autres races	3 races	36	13	2	9	4	0	3	5	0	0	0	0
8	Ouidah	Avlékété	36	Homme	Peulh	Musulman	Bouvier	1	Agriculture	Elevage	Pas d'activité secondaire	Elevage	Aucune	Achat	Oui	Non	15	15	Non	Néant	Néant	6	1	1	2	0	2	0	Secondaire	Oui	Non	0	0	0	0	Bobodji	1 race	15	5	1	0	0	3	2	4	0	0	0	0
9	Ouidah	Avlékété	23	Homme	Peulh	Musulman	Bouvier	4	Agriculture	Elevage	Pas d'activité secondaire	Elevage	Aucune	Achat	Oui	Non	0.25	0.25	Non	Néant	Néant	1	1	0	0	0	0	0	Aucun	Non	Non	0	0	0	0	Bobodji	1 race	46	18	5	7	6	5	4	1	0	0	0	0
10	Ouidah	Avlékété	34	Homme	Peulh	Musulman	Bouvier	3	Fonctionnaire à la retraite	Elevage	Pas d'activité secondaire	Elevage	Aucune	Héritage	Oui	Non	1	8	Oui	Ne sait pas	Formation et rencontre pour discuter des conflits et défendre l'interet des éleveurs	4	1	1	1	0	1	0	Aucun	Non	Oui	2	0	0	0	Bobodji	1 race	53	12	1	22	4	2	4	8	0	0	0	0
11	Ouidah	Avlékété	49	Homme	Peulh	Musulman	Bouvier	5	Fonctionnaire en activité	Elevage	Agriculture	Elevage	Maraichère	Héritage	Oui	Oui	28	28	Oui	ANOPER	Commerce, tontine et aide financière	6	1	1	0	0	1	3	Aucun	Non	Oui	78	66	4	0	Bobodji	1 race	120	52	1	29	8	0	12	18	0	0	0	0
12	Ouidah	Houakpè-Daho	26	Homme	Peulh	Musulman	Bouvier	6	Commerçant	Elevage	Pas d'activité secondaire	Elevage	Aucune	Achat	Oui	Oui	2	2	Non	Néant	Néant	1	1	0	0	0	0	0	Secondaire	Non	Oui	6	0	0	0	Goudali et autres races	3 races	21	9	1	4	1	2	4	0	0	0	0	0
13	Ouidah	Houakpè-Daho	37	Homme	Peulh	Musulman	Bouvier	1	Fonctionnaire en activité	Elevage	Agriculture	Elevage	Manioc et canne à sucre	Achat	Oui	Non	5	5	Non	Néant	Néant	5	1	1	3	0	0	0	Aucun	Non	Oui	12	0	0	0	Bobodji et Yakana	2 races	20	8	1	0	1	0	3	7	0	0	0	0
14	Ouidah	Houakpè-Daho	16	Homme	Peulh	Musulman	Bouvier	1	Elevage	Elevage	Pas d'activité secondaire	Elevage	Aucune	Location	Non	Non	1.5	1.5	Non	Néant	Néant	1	1	0	0	0	0	0	Aucun	Non	Oui	20	10	0	0	Bobodji	1 race	26	10	2	6	1	0	3	4	0	0	0	0
15	Ouidah	Houakpè-Daho	17	Homme	Peulh	Musulman	Bouvier	1	Elevage	Elevage	Pas d'activité secondaire	Elevage	Aucune	Location	Non	Non	1	1	Non	Néant	Néant	1	1	0	0	0	0	0	Aucun	Non	Non	0	0	0	0	Bobodji	1 race	11	1	0	9	0	0	1	0	0	0	0	0
16	Ouidah	Pahou	60	Homme	Peulh	Musulman	Bouvier	1	Fonctionnaire à la retraite	Elevage	Agriculture	Elevage	Maïs	Achat	Oui	Non	7	7	Oui	ANOPER	Ne sait pas	13	1	2	2	3	3	2	Aucun	Non	Oui	30	5	0	0	Bobodji	1 race	43	24	1	4	4	0	4	6	0	0	0	0
17	Ouidah	Pahou	60	Homme	Peulh	Musulman	Bouvier	1	Fonctionnaire en activité	Elevage	Agriculture	Elevage	Maraichère et maïs	Achat	Oui	Non	3	30	Oui	ANOPER	Formation et rencontre pour discuter des conflits et défendre l'interet des éleveurs	4	1	1	1	1	0	0	Aucun	Oui	Oui	12	0	0	0	Goudali et autres races	2 races	76	39	1	15	11	0	6	4	0	0	0	0
18	Ouidah	Pahou	63	Homme	Peulh	Musulman	Bouvier	3	Ne sait pas	Elevage	Pas d'activité secondaire	Elevage	Aucune	Achat	Oui	Non	10	16	Non	Néant	Néant	8	1	1	1	1	2	2	Aucun	Non	Oui	11	0	6	0	Bobodji	1 race	38	14	3	6	4	0	5	6	0	0	0	0
19	Ouidah	Savi	21	Homme	Peulh	Musulman	Bouvier	1	Elevage	Elevage	Agriculture	Elevage	Maïs	Achat	Oui	Oui	8	8	Oui	Ne sait pas	Formation et rencontre pour discuter des conflits et défendre l'interet des éleveurs	3	1	1	0	0	1	0	Secondaire	Non	Oui	20	0	0	0	Goudali et autres races	3 races	174	80	10	20	20	0	22	22	0	0	0	0
20	Ouidah	Savi	28	Homme	Peulh	Musulman	Bouvier	1	Ne sait pas	Elevage	Agriculture	Elevage	Maïs	Achat	Oui	Non	1	2	Non	Néant	Néant	4	1	1	2	0	0	0	Aucun	Oui	Oui	3	0	0	0	Goudali et autres races	3 races	14	12	0	0	0	0	1	1	0	0	0	0
21	Ouidah	Savi	20	Homme	Peulh	Musulman	Bouvier	4	Fonctionnaire à la retraite	Elevage	Pas d'activité secondaire	Elevage	Aucune	Achat	Oui	Non	3	3	Non	Néant	Néant	2	2	0	0	0	0	0	Aucun	Non	Non	0	0	0	0	Bobodji et Yakana	2 races	42	18	1	8	6	1	4	4	0	0	0	0
22	Ouidah	Savi	32	Homme	Peulh	Musulman	Bouvier	1	Fonctionnaire en activité	Elevage	Agriculture	Elevage	Maraichère, maïs et haricot	Achat	Ne sait pas	Non	2	3	Non	Néant	Néant	6	1	1	0	0	4	0	Aucun	Oui	Non	0	0	0	0	Goudali et autres races	2 races	11	6	1	2	0	0	2	0	0	0	0	0
23	Ouidah	Ouidah	54	Homme	Peulh	Musulman	Bouvier	8	Fonctionnaire en activité	Elevage	Commercant	Commerçant	Aucune	Achat	Oui	Non	2	5	Oui	Ne sait pas	Formation et rencontre pour discuter des conflits et défendre l'interet des éleveurs	5	1	1	2	1	0	0	Aucun	Non	Oui	23	0	0	0	Goudali et autres races	3 races	31	12	1	2	3	7	3	3	0	0	0	0
24	Ouidah	Gapké	36	Homme	Peulh	Musulman	Bouvier	1	Commerçant	Elevage	Agriculture	Elevage	Maïs	Location	Non	Non	5	10	Oui	Ne sait pas	Ne sait pas	6	1	2	2	0	1	0	Aucun	Oui	Oui	20	0	0	0	Bobodji et Yakana	2 races	58	23	1	4	10	1	11	8	0	0	0	0
25	Ouidah	Savi	35	Homme	Peulh	Musulman	Bouvier	1	Religieux	Elevage	Agriculture	Elevage	Maïs	Achat	Oui	Non	1	1	Non	Néant	Néant	5	1	1	2	0	1	0	Aucun	Non	Oui	9	0	0	0	Bobodji et Yakana	2 races	38	14	6	5	1	0	6	6	0	0	0	0
26	Ouidah	Gapké	36	Homme	Peulh	Musulman	Bouvier	8	Commerçant	Elevage	Pas d'activité secondaire	Elevage	Aucune	Achat	Oui	Oui	3	3	Oui	ANOPER	Commerce, tontine et aide financière	5	1	1	1	1	0	1	Aucun	Non	Oui	32	0	5	0	Bobodji et Yakana	2 races	76	39	3	13	6	0	9	6	0	0	0	0
27	Ouidah	Savi	64	Homme	Peulh	Musulman	Bouvier	3	Fonctionnaire en activité	Elevage	Agriculture	Elevage	Maraichère et maïs	Achat	Oui	Oui	20	20	Oui	ANOPER	Formation et rencontre pour discuter des conflits et défendre l'interet des éleveurs	7	1	1	2	1	0	2	Primaire	Oui	Oui	30	0	0	0	Bobodji	1 race	49	20	2	10	2	0	10	5	0	0	0	0
28	Ouidah	Savi	37	Homme	Peulh	Musulman	Bouvier	2	Agriculture	Elevage	Agriculture	Elevage	Maïs	Héritage	Oui	Oui	12	12	Oui	ANOPER	Ne sait pas	14	5	4	2	2	1	0	Aucun	Oui	Oui	0	11	0	0	Goudali et autres races	3 races	115	56	2	13	19	2	13	10	0	0	0	0
29	Ouidah	Savi	50	Homme	Peulh	Musulman	Bouvier	1	Commerçant	Elevage	Pas d'activité secondaire	Elevage	Aucune	Location	Non	Non	2	3	Oui	ANOPER	Formation, rencontre pour discuter des conflits et commerce, tontine ou aide financière	7	2	1	1	0	3	0	Aucun	Non	Non	0	0	0	0	Goudali et autres races	3 races	57	35	3	1	6	2	5	5	0	0	0	0
31	Ouidah	Houakpè-Daho	49	Homme	Peulh	Musulman	Bouvier	1	Fonctionnaire en activité	Elevage	Pas d'activité secondaire	Elevage	Aucune	Achat	Ne sait pas	Non	15	15	Oui	Ne sait pas	Formation et rencontre pour discuter des conflits et défendre l'interet des éleveurs	9	1	1	3	2	1	1	Aucun	Non	Oui	11	7	9	0	Bobodji	1 race	49	15	3	4	6	5	10	6	0	0	0	0
32	Ouidah	Ouidah	48	Homme	Peulh	Musulman	Propriétaire	1	Commerçant	Elevage	Agriculture	Commerçant	Maïs et manioc	Achat	Oui	Oui	20	30	Oui	ANOPER	Formation, rencontre pour discuter des conflits et commerce, tontine ou aide financière	9	1	1	3	2	1	1	Aucun	Oui	Oui	0	5	0	0	Goudali et autres races	3 races	355	163	17	70	25	0	32	48	0	0	0	0
33	Ouidah	Ouidah	43	Homme	Peulh	Musulman	Propriétaire	1	Commerçant	Elevage	Pas d'activité secondaire	Elevage	Aucune	Location	Non	Oui	7	10	Oui	ANOPER	Formation et rencontre pour discuter des conflits et défendre l'interet des éleveurs	6	1	1	1	2	1	0	Primaire	Oui	Oui	50	20	15	0	Yakana	1 race	57	25	5	9	6	2	6	4	0	0	0	0
35	Ouidah	Houakpè-Daho	30	Homme	Peulh	Musulman	Bouvier	1	Ne sait pas	Elevage	Pas d'activité secondaire	Elevage	Aucune	Achat	Oui	Non	5	7	Oui	ANOPER	Information sur la répartition des terres paturable qu'a prévu l'Etat et l'enregistrement des éleveurs dans ce compte	5	1	2	1	0	1	0	Aucun	Non	Non	0	0	0	0	Bobodji	1 race	20	10	1	5	0	0	2	2	0	0	0	0
36	Ouidah	Houakpè-Daho	29	Homme	Peulh	Musulman	Propriétaire	2	Elevage	Elevage	Commercant	Elevage	Aucune	Location	Non	Oui	14	14	Oui	ANOPER	Formation et rencontre pour discuter des conflits et défendre l'interet des éleveurs	4	1	1	1	0	1	0	Aucun	Non	Oui	10	0	0	0	Bobodji	1 race	28	10	0	10	5	0	2	1	0	0	0	0
37	Ouidah	Pahou	60	Homme	Peulh	Musulman	Bouvier	1	Ne sait pas	Elevage	Pas d'activité secondaire	Elevage	Aucune	Héritage	Ne sait pas	Non	24	24	Oui	Ne sait pas	Formation et rencontre pour discuter des conflits et défendre l'interet des éleveurs	6	1	1	2	0	2	0	Aucun	Non	Non	0	0	0	0	Bobodji	1 race	120	50	2	23	16	4	16	9	0	0	0	0
38	Ouidah	Pahou	22	Homme	Peulh	Musulman	Bouvier	12	Commerçant	Elevage	Artisanat	Elevage	Aucune	Héritage	Ne sait pas	Non	3	3	Non	Néant	Néant	1	1	0	0	0	0	0	Primaire	Non	Oui	30	0	0	0	Bobodji et Yakana	2 races	24	10	3	4	0	0	6	1	0	0	0	0
39	Ouidah	Avlékété	28	Homme	Peulh	Musulman	Bouvier	3	Transformateur de produits agricoles	Elevage	Pas d'activité secondaire	Elevage	Maraichère	Achat	Ne sait pas	Non	2	10	Non	Néant	Néant	1	1	0	0	0	0	0	Primaire	Non	Non	0	0	0	0	Bobodji et Yakana	2 races	36	17	5	3	1	1	5	4	0	0	0	0
40	Ouidah	Houakpè-Daho	29	Homme	Peulh	Musulman	Bouvier	1	Ne sait pas	Elevage	Pas d'activité secondaire	Elevage	Aucune	Ne sait pas	Ne sait pas	Non	1	10	Non	Néant	Néant	1	1	0	0	0	0	0	Aucun	Non	Non	0	0	0	0	Bobodji	1 race	49	20	2	7	6	1	9	4	0	0	0	0
41	Ouidah	Houakpè-Daho	36	Homme	Peulh	Musulman	Bouvier	1	Artisanat	Elevage	Pas d'activité secondaire	Elevage	Aucune	Achat	Oui	Non	11	11	Non	Néant	Néant	6	1	1	3	0	1	0	Primaire	Oui	Oui	7	0	0	0	Bobodji et Yakana	2 races	46	20	1	14	6	0	4	1	0	0	0	0
42	Ouidah	Avlékété	39	Homme	Peulh	Musulman	Bouvier	6	Ne sait pas	Elevage	Pas d'activité secondaire	Elevage	Aucune	Héritage	Oui	Non	10	10	Non	Néant	Néant	5	1	1	1	0	1	1	Aucun	Non	Oui	6	5	0	0	Bobodji	1 race	26	5	1	6	7	1	0	6	0	0	0	0
43	Ouidah	Avlékété	30	Homme	Peulh	Musulman	Bouvier	1	Pêche	Elevage	Pas d'activité secondaire	Elevage	Aucune	Location	Ne sait pas	Non	0.6	2	Non	Néant	Néant	1	1	0	0	0	0	0	Aucun	Non	Non	0	0	0	0	Bobodji	1 race	11	4	0	3	0	1	2	1	0	0	0	0
44	Ouidah	Avlékété	50	Homme	Peulh	Musulman	Bouvier	1	Ne sait pas	Elevage	Agriculture	Elevage	Maïs	Location	Ne sait pas	Oui	0.4	1.4	Non	Néant	Néant	8	1	2	2	1	2	0	Aucun	Non	Oui	20	0	0	0	Bobodji et Yakana	2 races	61	28	2	10	6	0	8	7	0	0	0	0
45	Ouidah	Avlékété	15	Homme	Peulh	Musulman	Bouvier	1	Pêche	Elevage	Pas d'activité secondaire	Elevage	Aucune	Achat	Oui	Non	0.25	1.75	Non	Néant	Néant	8	0	1	2	1	3	1	Aucun	Non	Non	0	0	0	0	Bobodji et Yakana	2 races	29	8	1	6	6	0	6	2	0	0	0	0
46	Ouidah	Pahou	50	Homme	Peulh	Musulman	Bouvier	1	Fonctionnaire à la retraite	Elevage	Pas d'activité secondaire	Elevage	Aucune	Achat	Oui	Non	10	15	Non	Néant	Néant	5	1	1	1	1	1	0	Aucun	Non	Non	0	0	0	0	Bobodji et Yakana	2 races	56	31	1	10	5	0	5	4	0	0	0	0
47	Ouidah	Houakpè-Daho	28	Homme	Peulh	Musulman	Bouvier	1	Ne sait pas	Elevage	Pas d'activité secondaire	Elevage	Aucune	Ne sait pas	Ne sait pas	Non	8	10	Oui	Ne sait pas	Formation et rencontre pour discuter des conflits et défendre l'interet des éleveurs	5	1	1	3	0	0	0	Aucun	Non	Non	0	0	0	0	Bobodji	1 race	47	5	5	20	6	1	5	5	0	0	0	0
48	Ouidah	Houakpè-Daho	26	Homme	Peulh	Musulman	Bouvier	1	Fonctionnaire en activité	Elevage	Pas d'activité secondaire	Elevage	Aucune	Achat	Ne sait pas	Non	1	1	Oui	Ne sait pas	Formation et rencontre pour discuter des conflits et défendre l'interet des éleveurs	1	1	0	0	0	0	0	Secondaire	Non	Non	0	0	0	0	Bobodji	1 race	21	16	1	0	2	0	0	2	0	0	0	0
49	Ouidah	Houakpè-Daho	28	Homme	Peulh	Musulman	Bouvier	1	Entrepreneur	Elevage	Pas d'activité secondaire	Elevage	Aucune	Achat	Oui	Non	1	1	Non	Néant	Néant	1	1	0	0	0	0	0	Primaire	Non	Non	0	0	0	0	Bobodji	1 race	11	5	1	0	3	0	2	0	0	0	0	0
50	Ouidah	Houakpè-Daho	22	Homme	Peulh	Musulman	Bouvier	1	Ne sait pas	Elevage	Pas d'activité secondaire	Elevage	Aucune	Achat	Oui	Non	1	1	Non	Néant	Néant	1	1	0	0	0	0	0	Aucun	Non	Non	0	0	0	0	Bobodji	1 race	10	3	1	1	2	0	1	2	0	0	0	0
51	Ouidah	Gapké	40	Homme	Peulh	Musulman	Bouvier	1	Commerçant	Elevage	Agriculture	Elevage	Maïs	Location	Ne sait pas	Non	3	15	Non	Néant	Néant	5	1	1	1	1	1	0	Aucun	Non	Oui	8	0	0	0	Bobodji et Yakana	2 races	35	12	1	11	4	0	2	5	0	0	0	0
52	Ouidah	Avlékété	22	Homme	Peulh	Musulman	Bouvier	1	Ne sait pas	Elevage	Pas d'activité secondaire	Elevage	Aucune	Héritage	Ne sait pas	Non	5	7	Non	Néant	Néant	7	1	1	1	1	0	3	Aucun	Non	Oui	2	0	0	0	Bobodji	1 race	36	19	0	8	3	0	3	3	0	0	0	0
53	Ouidah	Avlékété	51	Homme	Peulh	Musulman	Bouvier	4	Ne sait pas	Elevage	Agriculture	Elevage	Maraichère	Achat	Ne sait pas	Non	16	25	Oui	Ne sait pas	Ne sait pas	9	1	1	1	3	1	2	Aucun	Non	Non	0	0	0	0	Bobodji	1 race	40	14	3	8	5	0	2	8	0	0	0	0
54	Ouidah	Gapké	30	Homme	Peulh	Musulman	Bouvier	1	Fonctionnaire à la retraite	Elevage	Agriculture	Elevage	Maïs	Location	Ne sait pas	Oui	3	17	Non	Néant	Néant	3	1	1	0	0	1	0	Aucun	Non	Oui	3	0	0	0	Bobodji	1 race	38	13	2	6	2	0	8	7	0	0	0	0
55	Ouidah	Savi	17	Homme	Peulh	Musulman	Bouvier	1	Commerçant	Elevage	Agriculture	Elevage	Maraichère	Achat	Ne sait pas	Oui	2	3	Non	Néant	Néant	1	1	0	0	0	0	0	Aucun	Non	Oui	1	0	0	0	Goudali et autres races	3 races	38	13	2	3	5	0	8	7	0	0	0	0
56	Ouidah	Savi	50	Homme	Peulh	Musulman	Bouvier	1	Agriculture	Elevage	Agriculture	Elevage	Maïs	Achat	Ne sait pas	Non	3	3	Non	Néant	Néant	4	1	1	1	0	1	0	Aucun	Non	Oui	20	0	0	0	Bobodji et Yakana	2 races	28	10	1	9	4	0	1	3	0	0	0	0
57	Ouidah	Gapké	50	Homme	Peulh	Musulman	Bouvier	1	Ne sait pas	Elevage	Agriculture	Elevage	Maïs	Location	Ne sait pas	Non	1	25	Non	Néant	Néant	4	0	0	1	1	1	1	Aucun	Non	Oui	10	0	0	0	Yakana	1 race	26	5	1	6	4	0	5	5	0	0	0	0
58	Ouidah	Savi	72	Homme	Peulh	Musulman	Bouvier	1	Fonctionnaire à la retraite	Elevage	Agriculture	Elevage	Maïs	Ne sait pas	Ne sait pas	Non	16	40	Non	Néant	Néant	1	1	0	0	0	0	0	Aucun	Non	Non	0	0	0	0	Bobodji	1 race	40	16	2	4	2	2	8	6	0	0	0	0
59	Ouidah	Savi	35	Homme	Peulh	Musulman	Bouvier	1	Fonctionnaire à la retraite	Elevage	Agriculture	Elevage	Maïs	Ne sait pas	Ne sait pas	Non	1	1	Non	Néant	Néant	4	1	1	1	0	1	0	Aucun	Non	Non	0	0	0	0	Bobodji	1 race	67	23	3	12	4	0	11	9	0	0	0	0
60	Ouidah	Houakpè-Daho	21	Homme	Peulh	Musulman	Bouvier	1	Ne sait pas	Elevage	Pas d'activité secondaire	Elevage	Aucune	Achat	Ne sait pas	Non	2	4	Oui	ANOPER	Information sur la répartition des terres paturable qu'a prévu l'Etat et l'enregistrement des éleveurs dans ce compte	1	1	0	0	0	0	0	Aucun	Non	Non	0	0	0	0	Bobodji	1 race	47	20	3	14	5	0	2	3	0	0	0	0
61	Ouidah	Avlékété	18	Homme	Peulh	Musulman	Bouvier	10	Pêche	Elevage	Pas d'activité secondaire	Elevage	Aucune	Héritage	Ne sait pas	Non	1	1	Non	Néant	Néant	1	1	0	0	0	0	0	Aucun	Non	Non	0	0	0	0	Bobodji	1 race	79	44	3	15	2	1	9	5	0	0	0	0
62	Ouidah	Houakpè-Daho	28	Homme	Peulh	Musulman	Bouvier	1	Commerçant	Elevage	Pas d'activité secondaire	Elevage	Aucune	Achat	Non	Non	1	8	Oui	Ne sait pas	Ne sait pas	1	1	0	0	0	0	0	Aucun	Non	Non	0	0	0	0	Bobodji	1 race	47	20	9	11	0	3	2	2	0	0	0	0
63	Ouidah	Houakpè-Daho	42	Homme	Peulh	Musulman	Bouvier	1	Commerçant	Elevage	Pas d'activité secondaire	Elevage	Aucune	Héritage	Oui	Non	8	8	Oui	Ne sait pas	Formation et rencontre pour discuter des conflits et défendre l'interet des éleveurs	5	1	1	3	0	0	0	Aucun	Non	Oui	15	0	0	0	Bobodji	1 race	27	10	2	4	3	0	3	5	0	0	0	0
64	Ouidah	Houakpè-Daho	49	Homme	Peulh	Musulman	Bouvier	1	Fonctionnaire à la retraite	Elevage	Pas d'activité secondaire	Elevage	Aucune	Ne sait pas	Ne sait pas	Non	3	3	Oui	Ne sait pas	Ne sait pas	4	1	1	2	0	0	0	Aucun	Non	Oui	6	0	0	0	Bobodji	1 race	15	6	1	0	0	0	2	6	0	0	0	0
65	Ouidah	Houakpè-Daho	39	Homme	Peulh	Musulman	Bouvier	2	Fonctionnaire à la retraite	Elevage	Agriculture	Elevage	Pastèque	Héritage	Ne sait pas	Non	3	15	Oui	Ne sait pas	Ne sait pas	6	1	1	1	0	3	0	Aucun	Non	Oui	35	0	0	0	Goudali et autres races	2 races	35	15	4	7	6	0	2	1	0	0	0	0
66	Ouidah	Savi	30	Homme	Peulh	Musulman	Bouvier	1	Fonctionnaire en activité	Elevage	Pas d'activité secondaire	Elevage	Aucune	Héritage	Ne sait pas	Non	0.4	3	Non	Néant	Néant	3	1	1	0	0	1	0	Aucun	Non	Oui	11	0	2	0	Bobodji	1 race	32	15	1	9	4	0	0	3	0	0	0	0
67	Ouidah	Ouidah	32	Homme	Peulh	Musulman	Bouvier	1	Fonctionnaire en activité	Elevage	Pas d'activité secondaire	Elevage	Aucune	Location	Ne sait pas	Non	17	17	Oui	ANOPER	Formation et rencontre pour discuter des conflits et défendre l'interet des éleveurs	4	1	1	0	0	1	1	Aucun	Non	Non	0	0	0	0	Bobodji	1 race	45	10	3	5	8	0	10	9	0	0	0	0
1	Comè	Akodéha	30	Homme	Peulh	Musulman	Propriétaire	1	Elevage	Elevage	Agriculture	Elevage	Manioc	Achat	Oui	Oui	10	10	Non	Néant	Néant	3	1	1	1	0	0	0	Secondaire	Oui	Oui	0	15	0	0	Bobodji et Yakana	2 races	105	44	2	12	9	0	18	20	0	0	0	0
2	Comè	Comè	40	Homme	Peulh	Musulman	Bouvier	1	Agriculture	Elevage	Agriculture	Agriculture	Maïs	Location	Non	Oui	4	10	Non	Néant	Néant	13	1	1	1	3	4	3	Aucun	Non	Oui	30	0	0	0	Yakana	1 race	36	18	1	5	7	0	1	4	0	0	0	0
3	Comè	Oumako	18	Homme	Peulh	Musulman	Bouvier	2	Elevage	Elevage	Pas d'activité secondaire	Elevage	Aucune	Achat	Oui	Non	0.5	0.5	Oui	ANOPER	Formation et rencontre pour discuter des conflits et défendre l'interet des éleveurs	1	1	0	0	0	0	0	Aucun	Non	Non	0	0	0	0	Yakana	1 race	123	54	2	22	15	0	14	16	0	0	0	0
4	Comè	Oumako	62	Homme	Peulh	Musulman	Bouvier	1	Elevage	Elevage	Agriculture	Elevage	Maïs	Achat	Oui	Non	8	45	Non	Néant	Néant	11	1	1	0	5	0	4	Aucun	Non	Oui	40	2	0	0	Bobodji	1 race	154	40	4	40	20	0	23	27	0	0	0	0
5	Comè	Comè	70	Homme	Peulh	Musulman	Bouvier	1	Fonctionnaire à la retraite	Elevage	Pas d'activité secondaire	Elevage	Aucune	Achat	Oui	Non	20	50	Non	Néant	Néant	7	1	1	1	1	3	0	Aucun	Non	Oui	20	8	0	0	Bobodji	1 race	100	38	1	18	14	0	15	14	0	0	0	0
6	Comè	Comè	32	Homme	Peulh	Musulman	Bouvier	1	Fonctionnaire à la retraite	Elevage	Pas d'activité secondaire	Elevage	Aucune	Achat	Oui	Oui	6	10	Oui	ANOPER	Formation et rencontre pour discuter des conflits et défendre l'interet des éleveurs	4	1	1	0	0	2	0	Aucun	Non	Oui	50	0	5	0	Yakana	1 race	100	45	1	18	6	0	15	15	0	0	0	0
7	Comè	Comè	35	Homme	Peulh	Musulman	Bouvier	1	Fonctionnaire en activité	Elevage	Pas d'activité secondaire	Elevage	Aucune	Achat	Oui	Oui	1	15	Non	Néant	Néant	4	1	1	2	0	0	0	Aucun	Non	Oui	20	6	0	0	Yakana	1 race	18	8	0	2	3	0	3	2	0	0	0	0
8	Comè	Comè	55	Homme	Peulh	Musulman	Propriétaire	1	Elevage	Elevage	Pas d'activité secondaire	Elevage	Aucune	Métayage	Non	Oui	20	40	Non	Néant	Néant	7	1	1	0	4	0	1	Aucun	Non	Non	0	0	0	0	Bobodji	1 race	51	21	0	12	8	0	5	5	3	1	0	2
9	Comè	Comè	60	Homme	Peulh	Musulman	Propriétaire	1	Elevage	Elevage	Pas d'activité secondaire	Elevage	Aucune	Héritage	Non	Oui	40	40	Non	Néant	Néant	17	1	2	0	9	2	3	Aucun	Non	Oui	50	30	0	0	Goudali et autres races	1 race	57	25	2	15	5	0	5	5	0	0	0	0
10	Comè	Comè	62	Homme	Peulh	Musulman	Propriétaire	1	Elevage	Elevage	Pas d'activité secondaire	Elevage	Aucune	Location	Non	Oui	40	40	Non	Néant	Néant	14	1	2	4	1	4	2	Aucun	Non	Oui	30	0	0	0	Yakana	1 race	83	32	1	24	10	0	12	4	0	0	0	0
11	Comè	Comè	28	Homme	Peulh	Musulman	Propriétaire	1	Fonctionnaire en activité	Elevage	Pas d'activité secondaire	Elevage	Aucune	Achat	Oui	Oui	2	14	Non	Néant	Néant	1	1	0	0	0	0	0	Primaire	Oui	Non	0	0	0	0	Yakana	1 race	50	25	3	15	0	0	3	4	0	0	0	0
12	Comè	Comè	25	Homme	Peulh	Musulman	Bouvier	1	Fonctionnaire à la retraite	Elevage	Pas d'activité secondaire	Elevage	Aucune	Héritage	Non	Non	5	10	Non	Néant	Néant	2	1	1	0	0	0	0	Aucun	Non	Non	0	0	0	0	Bobodji	1 race	26	10	2	5	2	0	3	4	0	0	0	0
13	Comè	Oumako	28	Homme	Peulh	Musulman	Bouvier	1	Fonctionnaire en activité	Elevage	Pas d'activité secondaire	Elevage	Aucune	Achat	Oui	Non	2	10	Non	Néant	Néant	3	1	1	1	0	0	0	Aucun	Oui	Oui	30	0	0	0	Yakana	1 race	140	62	2	18	15	0	17	26	0	0	0	0
14	Comè	Oumako	29	Homme	Peulh	Musulman	Bouvier	2	Elevage	Elevage	Pas d'activité secondaire	Elevage	Aucune	Achat	Oui	Non	6	10	Oui	ANOPER	Ne sait pas	4	1	1	1	0	1	0	Secondaire	Oui	Non	0	0	0	0	Yakana	1 race	134	58	1	20	15	0	16	24	0	0	0	0
15	Comè	Comè	25	Homme	Peulh	Musulman	Bouvier	1	Fonctionnaire en activité	Elevage	Pas d'activité secondaire	Elevage	Aucune	Achat	Non	Non	3	7	Non	Néant	Néant	5	1	1	3	0	0	0	Aucun	Non	Non	0	0	0	0	Bobodji	1 race	39	12	2	8	4	0	5	8	0	0	0	0
16	Comè	Comè	35	Homme	Peulh	Musulman	Propriétaire	1	Elevage	Elevage	Pas d'activité secondaire	Elevage	Aucune	Métayage	Non	Oui	10	15	Non	Néant	Néant	4	1	1	1	0	1	0	Secondaire	Oui	Oui	40	0	0	0	Yakana	1 race	51	30	1	8	7	0	3	2	0	0	0	0
17	Comè	Comè	42	Homme	Peulh	Musulman	Propriétaire	1	Elevage	Elevage	Pas d'activité secondaire	Elevage	Aucune	Location	Non	Oui	27	27	Non	Néant	Néant	7	1	2	3	0	1	0	Aucun	Non	Oui	10	0	0	0	Yakana	1 race	32	10	1	8	3	0	6	4	0	0	0	0
18	Comè	Comè	60	Homme	Peulh	Musulman	Propriétaire	1	Elevage	Elevage	Pas d'activité secondaire	Elevage	Aucune	Héritage	Non	Oui	30	30	Non	Néant	Néant	4	1	1	1	0	1	0	Aucun	Non	Oui	30	20	0	0	Yakana	1 race	61	25	6	10	6	0	10	4	0	0	0	0
19	Comè	Oumako	29	Homme	Peulh	Musulman	Bouvier	1	Elevage	Elevage	Pas d'activité secondaire	Elevage	Aucune	Location	Oui	Non	0.5	15	Oui	ANOPER	Formation et rencontre pour discuter des conflits et défendre l'interet des éleveurs	4	1	1	1	0	1	0	Aucun	Non	Oui	20	0	0	0	Yakana	1 race	89	42	2	15	9	0	9	12	0	0	0	0
20	Comè	Comè	25	Homme	Peulh	Musulman	Bouvier	1	Agriculture	Elevage	Pas d'activité secondaire	Elevage	Aucune	Achat	Oui	Non	1	10	Non	Néant	Néant	1	1	0	0	0	0	0	Aucun	Non	Non	0	0	0	0	Bobodji	1 race	21	10	1	0	3	0	3	4	0	0	0	0
21	Comè	Comè	48	Homme	Peulh	Musulman	Bouvier	1	Boucher	Elevage	Agriculture	Elevage	Maïs	Achat	Oui	Oui	4	21	Non	Néant	Néant	17	1	2	5	3	4	2	Aucun	Non	Oui	40	6	0	0	Bobodji et Yakana	2 races	84	40	1	10	6	0	12	15	0	0	0	0
22	Comè	Comè	65	Homme	Peulh	Musulman	Propriétaire	1	Elevage	Elevage	Pas d'activité secondaire	Elevage	Aucune	Location	Non	Oui	40	50	Non	Néant	Néant	12	1	1	2	3	1	4	Aucun	Non	Oui	50	20	0	0	Bobodji et Yakana	2 races	92	38	2	30	6	0	10	6	0	0	0	0
23	Comè	Oumako	20	Homme	Peulh	Musulman	Bouvier	1	Fonctionnaire en activité	Elevage	Pas d'activité secondaire	Elevage	Aucune	Location	Non	Non	3	5	Non	Néant	Néant	1	1	0	0	0	0	0	Aucun	Non	Non	0	0	0	0	Bobodji	1 race	38	18	1	5	4	0	4	6	0	0	0	0
24	Comè	Oumako	30	Homme	Peulh	Musulman	Bouvier	1	Fonctionnaire en activité	Elevage	Pas d'activité secondaire	Elevage	Aucune	Métayage	Non	Non	1	15	Non	Néant	Néant	1	1	0	0	0	0	0	Aucun	Non	Non	0	0	0	0	Goudali et autres races	2 races	78	30	1	10	15	0	10	12	0	0	0	0
25	Comè	Comè	42	Homme	Peulh	Musulman	Propriétaire	1	Elevage	Elevage	Pas d'activité secondaire	Elevage	Aucune	Location	Non	Oui	20	20	Non	Néant	Néant	5	1	1	0	0	1	2	Aucun	Non	Non	0	0	0	0	Bobodji	1 race	79	40	2	10	11	0	9	7	0	0	0	0
26	Comè	Comè	18	Homme	Peulh	Musulman	Bouvier	1	Fonctionnaire à la retraite	Elevage	Pas d'activité secondaire	Elevage	Aucune	Métayage	Non	Non	1	1	Non	Néant	Néant	1	1	0	0	0	0	0	Aucun	Non	Non	0	0	0	0	Bobodji	1 race	52	20	1	15	9	0	4	3	0	0	0	0
27	Comè	Oumako	28	Homme	Peulh	Musulman	Bouvier	1	Elevage	Elevage	Pas d'activité secondaire	Elevage	Aucune	Achat	Oui	Non	5	10	Non	Néant	Néant	1	1	0	0	0	0	0	Aucun	Non	Non	0	0	0	0	Yakana	1 race	55	25	1	7	10	0	5	7	0	0	0	0
28	Comè	Comè	65	Homme	Peulh	Musulman	Propriétaire	1	Elevage	Elevage	Agriculture	Elevage	Maïs	Location	Oui	Oui	22	45	Non	Néant	Néant	12	1	2	0	0	2	7	Aucun	Non	Oui	50	0	30	0	Bobodji et Yakana	2 races	74	30	2	19	10	0	9	4	0	0	0	0
29	Comè	Comè	27	Homme	Peulh	Musulman	Bouvier	1	Fonctionnaire à la retraite	Elevage	Agriculture	Elevage	Maïs	Achat	Oui	Non	7	10	Non	Néant	Néant	5	1	1	1	0	2	0	Aucun	Non	Oui	20	0	0	0	Bobodji	1 race	110	40	4	25	10	0	15	16	0	0	0	0
30	Comè	Comè	32	Homme	Peulh	Musulman	Bouvier	1	Fonctionnaire à la retraite	Elevage	Pas d'activité secondaire	Elevage	Aucune	Location	Non	Oui	10	14	Non	Néant	Néant	6	1	1	2	0	2	0	Aucun	Non	Oui	30	0	0	0	Bobodji et Yakana	2 races	58	25	2	15	6	0	4	6	0	0	0	0
31	Grand-Popo	Adjaha	20	Homme	Peulh	Musulman	Bouvier	5	Fonctionnaire en activité	Elevage	Pas d'activité secondaire	Elevage	Aucune	Achat	Oui	Non	2	5	Non	Néant	Néant	1	1	0	0	0	0	0	Aucun	Non	Non	0	0	0	0	Bobodji et Yakana	2 races	144	50	3	40	20	0	14	17	0	0	0	0
32	Grand-Popo	Agoué	45	Homme	Peulh	Musulman	Bouvier	1	Agriculture	Elevage	Pas d'activité secondaire	Elevage	Aucune	Location	Non	Non	2	30	Non	Néant	Néant	8	1	1	2	0	3	1	Aucun	Non	Oui	5	0	0	0	Bobodji	1 race	38	26	2	1	2	0	6	1	0	0	0	0
33	Grand-Popo	Adjaha	19	Homme	Peulh	Musulman	Bouvier	2	Fonctionnaire à la retraite	Elevage	Pas d'activité secondaire	Elevage	Aucune	Location	Non	Non	5	9	Non	Néant	Néant	1	1	0	0	0	0	0	Aucun	Non	Oui	20	10	0	0	Goudali et autres races	2 races	90	30	3	22	16	0	9	10	0	0	0	0
34	Grand-Popo	Adjaha	43	Homme	Peulh	Musulman	Bouvier	1	Fonctionnaire à la retraite	Elevage	Pas d'activité secondaire	Elevage	Aucune	Achat	Oui	Non	15	25	Non	Néant	Néant	5	1	1	2	0	1	0	Aucun	Non	Non	0	0	0	0	Goudali et autres races	3 races	45	20	1	10	6	0	1	7	0	0	0	0
35	Grand-Popo	Agoué	30	Homme	Peulh	Musulman	Bouvier	6	Elevage	Elevage	Pas d'activité secondaire	Elevage	Aucune	Location	Non	Oui	3	15	Oui	ANOPER	Formation et rencontre pour discuter des conflits et défendre l'interet des éleveurs	1	1	0	0	0	0	0	Universitaire	Oui	Oui	30	30	0	0	Bobodji	1 race	64	25	3	12	9	0	7	8	0	0	0	0
37	Grand-Popo	Gbéhoué	40	Homme	Peulh	Musulman	Propriétaire	1	Elevage	Elevage	Pas d'activité secondaire	Elevage	Aucune	Location	Non	Oui	20	25	Non	Néant	Néant	4	1	1	2	0	0	0	Aucun	Non	Oui	20	0	0	0	Yakana	1 race	15	6	1	4	1	0	1	2	0	0	0	0
38	Grand-Popo	Djanglanmey	29	Homme	Peulh	Musulman	Bouvier	2	Agriculture	Elevage	Pas d'activité secondaire	Elevage	Aucune	Location	Non	Non	5	8	Non	Néant	Néant	4	1	1	2	0	0	0	Aucun	Non	Oui	0	6	0	0	Bobodji et Yakana	2 races	90	40	3	21	7	0	11	8	0	0	0	0
39	Grand-Popo	Grand-Popo	37	Homme	Peulh	Musulman	Bouvier	1	Fonctionnaire en activité	Elevage	Pas d'activité secondaire	Elevage	Aucune	Héritage	Oui	Non	3	20	Non	Néant	Néant	5	1	1	1	0	2	0	Aucun	Non	Oui	20	0	0	0	Bobodji et Yakana	2 races	42	20	1	7	2	0	2	10	0	0	0	0
40	Grand-Popo	Grand-Popo	41	Homme	Peulh	Musulman	Propriétaire	1	Elevage	Elevage	Pas d'activité secondaire	Elevage	Aucune	Location	Non	Oui	5	10	Non	Néant	Néant	7	1	1	1	1	3	0	Aucun	Non	Non	0	0	0	0	Goudali et autres races	2 races	68	25	2	30	3	0	5	3	0	0	0	0
41	Grand-Popo	Adjaha	24	Homme	Peulh	Musulman	Bouvier	1	Elevage	Elevage	Pas d'activité secondaire	Elevage	Aucune	Location	Non	Non	1	10	Non	Néant	Néant	2	1	1	0	0	0	0	Aucun	Non	Non	0	0	0	0	Yakana	1 race	56	15	6	18	0	0	7	10	0	0	0	0
42	Grand-Popo	Adjaha	65	Homme	Peulh	Musulman	Propriétaire	1	Elevage	Elevage	Pas d'activité secondaire	Elevage	Aucune	Héritage	Non	Oui	25	35	Oui	ANOPER	Formation et rencontre pour discuter des conflits et défendre l'interet des éleveurs	12	1	2	1	4	1	3	Aucun	Non	Oui	0	20	0	0	Bobodji et Yakana	2 races	149	100	2	15	5	4	15	8	0	0	0	0
43	Grand-Popo	Gbéhoué	18	Homme	Peulh	Musulman	Bouvier	1	Fonctionnaire en activité	Elevage	Pas d'activité secondaire	Elevage	Aucune	Location	Non	Non	2	5	Non	Néant	Néant	1	1	0	0	0	0	0	Aucun	Non	Non	0	0	0	0	Bobodji et Yakana	2 races	16	7	1	2	3	0	1	2	0	0	0	0
44	Grand-Popo	Grand-Popo	26	Homme	Peulh	Musulman	Bouvier	1	Elevage	Elevage	Pas d'activité secondaire	Elevage	Aucune	Achat	Oui	Non	1	7	Oui	Ne sait pas	Formation et rencontre pour discuter des conflits et défendre l'interet des éleveurs	1	1	0	0	0	0	0	Aucun	Oui	Non	0	0	0	0	Bobodji et Yakana	2 races	27	8	2	8	3	0	3	3	0	0	0	0
45	Grand-Popo	Gbéhoué	23	Homme	Peulh	Musulman	Propriétaire	1	Fonctionnaire en activité	Elevage	Pas d'activité secondaire	Elevage	Aucune	Location	Non	Oui	13	13	Non	Néant	Néant	2	1	1	0	0	0	0	Aucun	Non	Non	0	0	0	0	Bobodji	1 race	35	10	0	12	4	0	3	6	0	0	0	0
46	Grand-Popo	Djanglanmey	35	Homme	Peulh	Musulman	Bouvier	1	Elevage	Elevage	Pas d'activité secondaire	Elevage	Aucune	Location	Non	Non	10	10	Non	Néant	Néant	10	1	2	1	2	3	1	Aucun	Non	Non	0	0	0	0	Bobodji et Yakana	2 races	60	21	4	7	12	0	5	11	0	0	0	0
47	Grand-Popo	Gbéhoué	25	Homme	Peulh	Musulman	Bouvier	1	Elevage	Elevage	Pas d'activité secondaire	Elevage	Aucune	Achat	Oui	Non	10	10	Non	Néant	Néant	3	1	1	1	0	0	0	Aucun	Non	Oui	30	10	0	0	Bobodji	1 race	27	11	0	7	0	3	6	0	0	0	0	0
48	Grand-Popo	Adjaha	30	Homme	Peulh	Musulman	Bouvier	3	Fonctionnaire en activité	Elevage	Pas d'activité secondaire	Elevage	Aucune	Location	Non	Non	4	15	Non	Néant	Néant	4	1	1	2	0	0	0	Aucun	Non	Non	0	0	0	0	Bobodji et Yakana	2 races	67	20	2	18	14	0	9	4	0	0	0	0
49	Grand-Popo	Djanglanmey	28	Homme	Peulh	Musulman	Bouvier	7	Elevage	Elevage	Pas d'activité secondaire	Elevage	Aucune	Location	Non	Non	10	15	Non	Néant	Néant	4	1	1	1	0	1	0	Aucun	Non	Non	0	0	0	0	Bobodji et Yakana	2 races	31	7	3	10	0	0	7	4	0	0	0	0
50	Grand-Popo	Adjaha	35	Homme	Peulh	Musulman	Bouvier	2	Fonctionnaire à la retraite	Elevage	Pas d'activité secondaire	Elevage	Aucune	Location	Non	Non	7	18	Non	Néant	Néant	5	1	1	2	0	1	0	Aucun	Non	Non	0	0	0	0	Bobodji et Yakana	2 races	64	27	3	14	8	0	5	7	0	0	0	0
51	Grand-Popo	Sazoué	29	Homme	Peulh	Musulman	Bouvier	2	Elevage	Elevage	Pas d'activité secondaire	Elevage	Aucune	Location	Non	Oui	7	10	Oui	ANOPER	Formation et rencontre pour discuter des conflits et défendre l'interet des éleveurs	4	1	1	1	0	1	0	Secondaire	Oui	Non	0	0	0	0	Bobodji	1 race	87	32	4	19	13	1	7	11	0	0	0	0
52	Grand-Popo	Sazoué	25	Homme	Peulh	Musulman	Bouvier	1	Commerçant	Elevage	Pas d'activité secondaire	Elevage	Aucune	Location	Non	Non	5	7	Non	Néant	Néant	2	1	1	0	0	0	0	Aucun	Non	Oui	12	3	0	0	Bobodji	1 race	114	35	4	20	15	0	22	18	0	0	0	0
53	Grand-Popo	Sazoué	28	Homme	Peulh	Musulman	Bouvier	2	Elevage	Elevage	Pas d'activité secondaire	Elevage	Aucune	Location	Non	Non	3	12	Non	Néant	Néant	1	1	0	0	0	0	0	Aucun	Non	Non	0	0	0	0	Bobodji	1 race	60	17	3	12	11	0	9	8	0	0	0	0
54	Grand-Popo	Djanglanmey	25	Homme	Peulh	Musulman	Bouvier	2	Elevage	Elevage	Pas d'activité secondaire	Elevage	Aucune	Location	Non	Non	2	5	Non	Néant	Néant	1	1	0	0	0	0	0	Aucun	Non	Non	0	0	0	0	Bobodji	1 race	46	21	6	7	5	0	4	3	0	0	0	0
55	Grand-Popo	Djanglanmey	29	Homme	Peulh	Musulman	Bouvier	4	Fonctionnaire à la retraite	Elevage	Pas d'activité secondaire	Elevage	Aucune	Location	Non	Oui	15	17	Non	Néant	Néant	4	1	1	1	0	1	0	Aucun	Non	Non	0	0	0	0	Bobodji	1 race	100	36	4	19	13	0	13	15	0	0	0	0
56	Grand-Popo	Djanglanmey	30	Homme	Peulh	Musulman	Bouvier	1	Elevage	Elevage	Pas d'activité secondaire	Elevage	Aucune	Location	Non	Non	15	15	Oui	ANOPER	Formation et rencontre pour discuter des conflits et défendre l'interet des éleveurs	8	1	1	4	0	1	1	Aucun	Non	Non	0	0	0	0	Bobodji	1 race	59	30	3	15	3	0	4	4	0	0	0	0
1	Grand-Popo	Djanglanmey	27	Homme	Peulh	Musulman	Bouvier	2	Fonctionnaire en activité	Elevage	Pas d'activité secondaire	Elevage	Aucune	Location	Non	Non	5	12	Non	Néant	Néant	4	1	1	1	0	1	0	Aucun	Non	Non	0	0	0	0	Yakana	1 race	47	18	2	11	7	0	3	6	0	0	0	0
2	Grand-Popo	Djanglanmey	25	Homme	Peulh	Musulman	Bouvier	1	Fonctionnaire en activité	Elevage	Pas d'activité secondaire	Elevage	Aucune	Location	Non	Non	4	10	Non	Néant	Néant	2	1	1	0	0	0	0	Aucun	Non	Non	0	0	0	0	Bobodji et Yakana	2 races	62	25	1	15	12	2	3	4	0	0	0	0
3	Grand-Popo	Djanglanmey	28	Homme	Peulh	Musulman	Propriétaire	7	Elevage	Elevage	Pas d'activité secondaire	Elevage	Aucune	Location	Non	Oui	4	10	Oui	ANOPER	Ne sait pas	4	1	1	2	0	0	0	Universitaire	Oui	Non	0	0	0	0	Bobodji et Yakana	2 races	80	30	1	35	4	0	4	6	0	0	0	0
4	Grand-Popo	Grand-Popo	21	Homme	Peulh	Musulman	Bouvier	1	Agriculture	Elevage	Pas d'activité secondaire	Elevage	Aucune	Ne sait pas	Ne sait pas	Non	2	7	Non	Néant	Néant	1	1	0	0	0	0	0	Secondaire	Oui	Non	0	0	0	0	Bobodji et Yakana	2 races	22	9	1	3	4	0	3	2	0	0	0	0
5	Grand-Popo	Agoué	29	Homme	Peulh	Musulman	Propriétaire	6	Elevage	Elevage	Artisanat	Elevage	Aucune	Location	Non	Oui	3	14	Oui	ANOPER	Ne sait pas	2	1	1	0	0	0	0	Universitaire	Oui	Oui	0	40	0	0	Bobodji et Yakana	2 races	100	55	1	14	7	0	7	16	85	0	0	0
6	Grand-Popo	Grand-Popo	32	Homme	Peulh	Musulman	Bouvier	4	Elevage	Elevage	Agriculture	Elevage	Maraichère	Métayage	Non	Non	8	12	Oui	ANOPER	Ne sait pas	5	1	1	2	0	1	0	Aucun	Non	Non	0	0	0	0	Bobodji	1 race	84	41	2	13	6	0	14	8	0	0	0	0
7	Grand-Popo	Gbéhoué	25	Homme	Peulh	Musulman	Bouvier	2	Fonctionnaire en activité	Elevage	Pas d'activité secondaire	Elevage	Aucune	Achat	Oui	Oui	5	5	Oui	Néant	Néant	1	1	0	0	0	0	0	Primaire	Non	Non	0	0	0	0	Bobodji	1 race	60	27	3	10	4	0	6	10	0	0	0	0
8	Grand-Popo	Gbéhoué	22	Homme	Peulh	Musulman	Bouvier	2	Elevage	Elevage	Pas d'activité secondaire	Elevage	Aucune	Achat	Oui	Oui	5	5	Non	Néant	Néant	3	1	1	1	0	0	0	Aucun	Non	Oui	15	0	0	0	Bobodji	1 race	48	20	2	10	3	0	6	7	0	0	0	0
9	Grand-Popo	Gbéhoué	32	Homme	Peulh	Musulman	Bouvier	1	Elevage	Fonctionnaire en activité	Elevage	Elevage	Aucune	Achat	Oui	Non	15	15	Non	Néant	Néant	3	1	1	1	0	0	0	Secondaire	Oui	Oui	20	10	0	0	Bobodji et Yakana	2 races	66	27	1	11	6	0	10	11	0	0	0	0
10	Grand-Popo	Gbéhoué	45	Homme	Peulh	Musulman	Bouvier	1	Fonctionnaire en activité	Elevage	Pas d'activité secondaire	Elevage	Aucune	Achat	Oui	Non	5	30	Non	Néant	Néant	4	1	1	1	0	1	0	Aucun	Non	Oui	4	0	0	0	Bobodji	1 race	20	7	0	6	1	0	2	4	0	0	0	0
11	Grand-Popo	Grand-Popo	53	Homme	Peulh	Musulman	Bouvier	7	Elevage	Elevage	Pas d'activité secondaire	Elevage	Aucune	Achat	Oui	Non	17	35	Oui	ANOPER	Ne sait pas	8	1	1	0	3	0	3	Aucun	Non	Non	0	0	0	0	Bobodji et Yakana	2 races	73	30	1	20	7	0	5	10	0	0	0	0
12	Grand-Popo	Grand-Popo	30	Homme	Peulh	Musulman	Bouvier	5	Agriculture	Elevage	Pas d'activité secondaire	Elevage	Aucune	Location	Non	Non	10	15	Oui	ANOPER	Ne sait pas	4	1	1	1	0	1	0	Aucun	Non	Oui	0	7	0	0	Bobodji	1 race	102	50	2	30	5	0	7	8	0	0	0	0
13	Grand-Popo	Sazoué	33	Homme	Peulh	Musulman	Bouvier	1	Agriculture	Elevage	Pas d'activité secondaire	Elevage	Aucune	Location	Ne sait pas	Non	5	15	Oui	ANOPER	Formation et rencontre pour discuter des conflits et défendre l'interet des éleveurs	4	1	1	2	0	0	0	Primaire	Oui	Non	0	0	0	0	Bobodji et Yakana	2 races	65	29	4	11	13	0	5	3	0	0	0	0
14	Grand-Popo	Sazoué	35	Homme	Peulh	Musulman	Bouvier	1	Commerçant	Elevage	Pas d'activité secondaire	Elevage	Aucune	Location	Non	Non	6	15	Oui	ANOPER	Formation et rencontre pour discuter des conflits et défendre l'interet des éleveurs	5	1	1	2	0	1	0	Aucun	Non	Non	0	0	0	0	Bobodji et Yakana	2 races	74	33	3	17	9	0	5	7	0	0	0	0
15	Grand-Popo	Agoué	31	Homme	Peulh	Musulman	Bouvier	2	Elevage	Elevage	Pas d'activité secondaire	Elevage	Aucune	Location	Ne sait pas	Non	7	10	Oui	ANOPER	Ne sait pas	5	1	1	2	0	1	0	Aucun	Non	Non	0	0	0	0	Bobodji	1 race	74	25	4	17	9	0	12	7	0	0	0	0
16	Grand-Popo	Agoué	35	Homme	Peulh	Musulman	Bouvier	5	Commerçant	Elevage	Agriculture	Elevage	Maraichère	Location	Non	Non	10	20	Non	Néant	Néant	4	1	1	1	0	1	0	Primaire	Non	Non	0	0	0	0	Bobodji	1 race	65	32	2	13	7	0	4	7	0	0	0	0
17	Grand-Popo	Gbéhoué	42	Homme	Peulh	Musulman	Bouvier	1	Fonctionnaire en activité	Elevage	Pas d'activité secondaire	Elevage	Aucune	Ne sait pas	Ne sait pas	Non	20	20	Non	Néant	Néant	6	1	1	2	0	2	0	Aucun	Non	Oui	12	0	0	0	Bobodji et Yakana	2 races	40	20	1	6	7	0	3	3	0	0	0	0
18	Grand-Popo	Adjaha	31	Homme	Peulh	Musulman	Bouvier	2	Elevage	Elevage	Pas d'activité secondaire	Elevage	Aucune	Location	Non	Oui	15	15	Non	Néant	Néant	6	1	1	0	0	4	0	Aucun	Non	Non	0	0	0	0	Bobodji	1 race	81	40	3	10	12	0	9	7	0	0	0	0
19	Grand-Popo	Adjaha	26	Homme	Peulh	Musulman	Bouvier	1	Fonctionnaire à la retraite	Elevage	Pas d'activité secondaire	Elevage	Aucune	Location	Non	Non	4	12	Oui	ANOPER	Ne sait pas	2	1	1	0	0	0	0	Aucun	Non	Non	0	0	0	0	Bobodji et Yakana	2 races	119	45	2	20	24	0	16	17	0	0	0	0
20	Grand-Popo	Adjaha	40	Homme	Peulh	Musulman	Bouvier	2	Fonctionnaire en activité	Elevage	Pas d'activité secondaire	Elevage	Aucune	Location	Non	Non	7	20	Oui	ANOPER	Ne sait pas	5	1	1	1	0	2	0	Aucun	Non	Oui	20	0	0	0	Bobodji	1 race	38	20	1	2	4	0	5	6	0	0	0	0
21	Grand-Popo	Adjaha	50	Homme	Peulh	Musulman	Bouvier	2	Elevage	Agriculture	Elevage	Elevage	Maïs	Achat	Oui	Oui	30	30	Oui	ANOPER	Ne sait pas	12	1	2	3	3	2	1	Aucun	Non	Oui	30	12	0	0	Bobodji	1 race	53	25	1	10	5	0	4	8	0	0	0	0
22	Grand-Popo	Adjaha	38	Homme	Peulh	Musulman	Propriétaire	3	Elevage	Elevage	Pas d'activité secondaire	Elevage	Aucune	Location	Non	Oui	20	20	Oui	ANOPER	Ne sait pas	12	1	2	5	1	2	1	Aucun	Non	Oui	14	6	0	0	Goudali et autres races	2 races	82	40	2	20	10	0	6	4	0	0	0	0
23	Grand-Popo	Adjaha	36	Homme	Peulh	Musulman	Bouvier	3	Commerçant	Elevage	Pas d'activité secondaire	Elevage	Aucune	Location	Ne sait pas	Non	10	20	Non	Néant	Néant	5	1	1	2	0	1	0	Aucun	Non	Non	0	0	0	0	Bobodji et Yakana	2 races	100	42	6	17	12	0	9	14	0	0	0	0
24	Grand-Popo	Adjaha	32	Homme	Peulh	Musulman	Bouvier	1	Elevage	Elevage	Pas d'activité secondaire	Elevage	Aucune	Location	Non	Non	5	15	Non	Néant	Néant	4	1	1	1	0	1	0	Aucun	Non	Non	0	0	0	0	Bobodji et Yakana	2 races	86	23	3	19	16	0	12	13	0	0	0	0
25	Grand-Popo	Adjaha	32	Homme	Peulh	Musulman	Bouvier	2	Fonctionnaire à la retraite	Elevage	Pas d'activité secondaire	Elevage	Aucune	Ne sait pas	Non	Non	5	10	Non	Néant	Néant	3	1	1	1	0	0	0	Aucun	Non	Non	0	0	0	0	Bobodji et Yakana	2 races	73	25	2	14	17	0	9	6	0	0	0	0
26	Grand-Popo	Gbéhoué	65	Homme	Peulh	Musulman	Bouvier	2	Boucher	Elevage	Pas d'activité secondaire	Elevage	Aucune	Location	Non	Non	5	50	Non	Néant	Néant	9	1	2	2	3	1	0	Aucun	Non	Non	0	0	0	0	Bobodji	1 race	17	7	1	5	1	0	2	1	0	0	0	0
27	Grand-Popo	Gbéhoué	20	Homme	Peulh	Musulman	Bouvier	3	Elevage	Elevage	Pas d'activité secondaire	Elevage	Aucune	Location	Non	Oui	2	5	Non	Néant	Néant	1	1	0	0	0	0	0	Aucun	Oui	Oui	0	6	0	0	Yakana	1 race	18	11	0	4	1	0	0	2	0	0	0	0
[truncated: 246 more columns]
